# Supplementary material for: Discovery, identification, and functional characterization of long noncoding RNAs in Arachis hypogaea L
Source: PubMed Central journal article supplement (PMC7330965; doi:10.1186/s12870-020-02510-4), 2020-07-02
Supplement: 12870_2020_2510_MOESM12_ESM.pdf [file 12870_2020_2510_MOESM12_ESM.pdf]

>T1

CAGTTCTTTATAACCTCATGGGTAATACTCATGTTAAACTAAGGTAACAATG  
AATATTTATAATCCAAAAAGTAAAAATAATTTAACAAAGGAACAGCTGCC  
AGCCGGAACATTTATTGCACTGAGAGTTAACATTGAGACCCTTTGAAAATC  
TGAGTGAACCTCTATGTCCTCCTAAGTCCTCACCAGAGGCTCCTGCTGTTACT  
CGTATAATATCTTCAATAAGTGCAAAGTTCCCAATATATCATGAGCACCCT  
CTGGGTTCCCCTTCCTTCGAGAAGATTAGCCGGAGCAGCGTCTTCATACTC  
CCTTATGAACGTTTAGATGCCTGAAGGATTAAGTGGATTTTTTCCCGCCAA  
CCTCTTGACAAATGAAACCAGCGCTTAAAAGAGGATCGGTTTCATCCCCG  
TTGGCACTATAAACTCCATCCTTTAAAAAGGGTCCTCATCTCCACCAATTG  
CTGATGTGTCAATCTGTGCGAAGCCATTGGATCACCTCACAATTGCCATCATG  
AAAGCGAAAAGACAGCTCCATGACCACAAATCTAGCTTTTCAATTTGACCC  
ATATTCCAATCAGCAATCACTCCTACAAATCATCC**CCCTCCCTAAACCCTAGT  
AGTG**

>T2

CAGTTCTTTATAACCTCATGGGTAATACTCATGTTAAACTAAGGTAACAATG  
AATATTTATAATCCAAAAAGTAAAAATAATTTAACAAAGGAACAGCTGCC  
AGCCGGAACATTTATTGCACTGAGAGTTAACATTGAGACCCTTTGAAAATC  
TGAGTGAACCTCTATGTCCTCCTAAGTCCTCACCAGAGGCTCCTGCTGTTACT  
CGTATAATATCTTCAATAAGTGCAAAGTTCCCAATATATCATGAGCACCCT  
CTGGGTTCCCCTTCCTTCGAGAAGATTAGCCGGAGCAGCGTCTTCATACTC  
CCTTATGAACGTTTAGATGCCTGAAGGATTAAGTGGATTTTTTCCCGCCAA  
CCTCTTGACAAATGAAAACCAGCGCTTAAAAGAGGATCGGTTTCATCCCC  
GTTGGCACTATAAACTCCATCCTTTAAAAAGGGTCCTCATCTCCACCAATT  
GCTGATGTGTCAATCTGAAACGGAATGTAGCATTTCGATTGAGAGGTTGAC  
TTATAAACATAGGCTCTTTACATTAGAATTCCGACCCCATACATAGAGTAAAT  
CTCCATATTTGGAGCATGTGGTAATCTGTGCGAAGCCATTGGATCACCTCACA  
ATTGCCATCATGAAAGCGAAAAGACAGCTCCATGACCACAAATCTAGCTTT  
TCAATTTGACCCATATTCCAATCAGCAATCACTCCTACAAATCATCC**CCCTC  
CCTAAACCCTAGTAGTG**

>T3

TGCACAAATGAAACCAGCGCTTAAAAGAGGATCGGTTTCATCCCCGTTGGC  
ACTATAAACTCCATCCTTTAAAAAAGGGTCCTCATCTCCACCAATTGCTGA  
TGTGTCAATCTGAAACGGAATGTAGCATTCCGATTGAGAGGTTGACTTATAA  
ACATAGGCTCTTTACATTAGAATTCCGACCCCATACATAGAGTAAATCTCCAT  
ATTTGGAGCATGTGGTAATCTAGTAGTGCCACCGCCGCCACTGCAAACACC  
AGAGCGGACCATCAAAGCAAATCATCATCCATCATGCCATCTCTCATAAA  
AGAGGGAAACAAAATATGCATTGATACAATAAGTACCCAAGAAAATAAAGA  
CCAAAAGATCAAAGAAACAATAAAGAATAAATAAAGGAACCAGCGGTTG  
AAATTACA**CCATACAGATTTTAAAGAATTTCC**

>T4

TGCACAAATGAAACCAGCGCTTAAAAGAGGATCGGTTTCATCCCCGTTGGC  
ACTATAAACTCCATCCTTTAAAAAAGGGTCCTCATCTCCACCAATTGCTGAT  
GTGTCAATCTGAAACGGAATGTAGCATTTCGATTGAGAGGTTGACTTATAA  
ACATAGGCTCTTTACATTAGAATTCCGACCCCATACATAGAGTAAATCTCCAT  
ATTTGGAGCATGTGGTAATCTGTCTGAAGCCATTGGATCACCTCACAATTGCC  
ATCATGAAAGCGAAAAGACAGCTCCATGACCACAAATCTAGCTTTTCAATT  
TGACCCATATTCCAATCAGCAATCACTCCTACAAATCATCCCCCTCCCTAAA  
CCCTACCCTTAACTTTCTTGAAAATTTTCTGACCTCATTTTCATATGCAGTAA  
AACTGTATTGCAATTTGAGAACCGAAACCAACAACAACCTCAATCGCTCTC  
TTATATATCTAGTAGTGCCACCGCCGCCACTGCAAACACCAGAGCGGACCA  
TCAAAGCAAATCATCATCCATCATGCCATCTCTCATAAAAGAGGGAAAC  
AAAATATGCATTGATACAATAAGTACCCAAGAAAATAAAGACCAAAGATC  
AAAGAAACAATAAAGAATAAAATAAAGGAACCAGCGGTTGAAATTACACC  
ATACAGATTTTAAAGAATTTCC

>T5

CCTCATCTCCACCAATTGCTGATGTGTCAATCTGAAACGGAATGTAGCATTC  
CGATTGAGAGGTTGACTTATAAACATAGGCTCTTTACATTAGAATTCCGACC  
CCATACATAGAGTAAATCTCCATATTTGGAGCATGTGGTAATCTGTCTGAAGC  
CATTGGATCACCTCACAATTGCCATCATGAAAGCGAAAAGACAGCTCCATG  
ACCACAAATCTAGCTTTTCAATTTGACCCATATTCCAATCAGCAATCTCCCA  
CAAATCATCCCCCTCCCTAAACCCTACCCTAGTAGTGCCACCGCCGCCACT  
GCAAACACCAGAGCGGACCATCAAAGCAAATCATCATCCATCATGCCAT  
CTCTCATAAAAGAGGGAAACAAAATATGCATTGATACAATAAGTACCCAAG  
AAAATAAAGACCAAAGATCAAAGAAACAATAAAGAATAAAATAAAGGAA  
CCCAGCGGTTGAAATTACACCATACAG

Note: the red words in T1 and T2 indicate the primers of 911-F and 911-R; the blue words in T3 and T4 show the primers of 806-F and 806-R; and the green words in T5 show the primers of 269-F and 269-R.
