# Supplementary material for: Discovery, identification, and functional characterization of long noncoding RNAs in Arachis hypogaea L
Source: PubMed Central journal article supplement (PMC7330965; doi:10.1186/s12870-020-02510-4), 2020-07-02
Supplement: 12870_2020_2510_MOESM14_ESM.pdf [file 12870_2020_2510_MOESM14_ESM.pdf]

>L1.1

ATGGCGGAGAAAGTATTCAGCGCGAAAGAGATCTTCGCCGCCGATTCGTCC  
AACATCTTCATAATGATTCTGGCATTGTTGATTTGGCTTGGAGCTATACACCT  
CAATTTCTCTTTATTCTCTTGTGATATTCCTTCCTCTCTCCAAATCACTCTT  
GCTTTTTGGTTTGCTGGTTGTGTTGGTGGTGATTCCGGTGGACGATAAGAG  
CAGATTGGGAAGAAGGTTGGCGAGGTCCTTAAGCAAGTATGCTTGTAGTTA  
CTTCCCGGTCACGCTTCATGTAGAGGATATGAATGCATTTGATCCTAATCGC  
GCTTATGTTTTTGGTTATGAACCACTCGGTTTTGCCAATTGGTGTTCATTG  
CGCTAGCTGAAAGCATTGGTTGGATGCCACTTCCAAAATTGAAAGTTCTTG  
CTAGCAGTGCAATTTTTTACATAACCGGTGTTGAGACACTTATGGACATGGTT  
TGGCGTCACACGCGCAGCAAAGAAAAATTTTATCTCCAGTTATCAGCTGG  
ATACTCTTGCGTTTTAATACCTGGTGGAGTGCAAGAAACATTTTTTATGAAG  
CATGGCTCCGAGATTGCTTTCCTTAAAACAAGAAGAGGATTTGTTCGTATAG  
CAATGGAGCGTGGTCATCCCTTGGTTCCAACTTTTTGGCTTTGGCCAGTCAG  
ATGTCTACAAGTGGTGGAAACCAAGTGGGACGTTGGTTATGAACTTTCAA  
GAGCTATAAAGTTCGCCCAATATTTTACTGGGGGATTTTCGGAACACCAAT  
ACCGTTCAGACGTCCAATGTATATAGCAGTGGGCAGACCAATTGAACCTCC  
CAAAAATCCAGAACCAACCCAGGAGGAGGTTGACAAAGTGCTTATTCAGT  
TTGTGGATGCACTACAAGATCTATTCGAAAGACACAAAGCTCGGGCTGGAT  
ATCCAAA**GCTTGAGTTAAGAATCCTATGA**

>L1.2

ATGGCGGAGAAAGTATTCAGCGCGAAAGGGATCTTCGCCGCCGGTTCGTCC  
AACATCTTCATAATGATTCTGGCATTGTTGATTTGGCTCGGAGCTATACACCT  
CAATTTCTCTTTATTCTCTTGTGATATTCCTTCCTCTCTCCAAATCACTCTT  
GCTTTTTGGTTTGCTGGTTGTGTTGGTGGTGATTCCGGTGGACGATAAGAG  
CAGATTGGGAAGAAGGTTGGCGAGGTCCTTAAGCAAGTATGCTTGTAGTTA  
CTTCCCGGTCACGCTTCATGTAGAGGATATGAATGCGTTTGATCCTAATCGC  
GCTTATGTGACAAGAGTATGCACAAAATGCAGTTTTTGGTTATGAACCACA  
CTCGGTTTTGCCAATTGGTGTTCATTGCACTAGCTGAAAGCATTGGTTGGATG  
CCACTTCCAAAATTGAAAGTTCTTGCTAGCAGTGCAATTTTTTACATAACCGG  
TGTTGAGACACTTATGGACATGGTTTGGCGTCACACGCGCAGCAAAGAAA  
AATTTTATCTCCAGTTATCAGCTGGATACTCTTGCGTTTTAATACCTGGTGG  
AGTGCAAGAAACATTTTTTATGAAGCATGGCTCCGAGATTGCTTTCCTTAAA  
ACAAGAAGAGGATTTGTTCGTATAGCAATGGAGCGTGGTCATCCCTTGGTT  
CCAACTTTTTGGTTGAGTCAGATGTCTACAAGTGGTGGAAACCAAGT  
GGGACGTTGGTTATGAACTTTCAAGAGCTATAAAGTTCGCCCAATATTTT  
ACTGGGGGATTTTCGGAACACCAATACCGTTCAGACGTCCAATGTATATAGC  
AGTGGGCAGACCAATTGAACCTCCTAAAAATCCAGAACCAACCCAGGAGG  
AGGTTGACAAAGTGCTTATTCAGTTTGTGGATGCACTACAAGATCTATTCGA  
AAGACACAAAGCTCGGGCTGGATATCCAAA**GCTTGAGTTAAGAATCCTATG**  
**A**

>L1.3

ATGGCGGAGAAAGTATTCAGCGCGAAAGAGATCTTCGCCGCCGATTCGTCC  
AACATCTTCATAGTGATTCTGACATTGTTGATTTGGCTCGGAGCTATACACC  
TCAATTCCTCTTTATTCTCTTGTTGATATTCCTTCCTCTCTCCAAATCACTCT  
TGCTTTTTGGTTTGCTGGTTGTGTTGGTGGTGATTCCGGTGGACGATAAGA  
GCAGATTGGGAAGAAGGTTGGCGAGGTCCTTAAGCAAGTATGCTTGTAGTT  
ACTTCCCGGTCACGCTTCATGTAGAGGATATGAATGCATTTGATCCTAATCG  
CGCTTATGTTTTGGTTATGAACCACACTCGGTTTTGCCAATTGGTGTCAATT  
GCACTAGCTGAAAGCATTGGTTGGATGCCACTTCCAAAATTGAAAGTTCTT  
GCTAGCAGTGCAATTTTTACATAACCGGTGTTGAGACACTTATGGACATGGT  
TTGGCGTCACACGCGCAGCAAAGAAAAATTTATCTCCAGTTATCAGCTG  
GATACTCTTGCCTTTAATACCTGGTGGAGTGCAAGAAACATTTTTTATGAA  
GCATGGCTCCGAGATTGCTTTCCTTAAAACAAGAAGAGGATTTGTCCGTAT  
AGCAATGGAGCGTGGCCATCCCTGGTTCCAACCTTTTTGCTTTGGTCAGAA  
CACCAATACCGTTCAGACGTCCAATGTATATAGCAGTGGGCAGACCAATTG  
AACCTCCCAAAAATCCAGAACCAACCCAGGAGGAGGTTGACAAAGTGCTT  
ATCAGTTTGTGGATGCACTACAAGATCTGTTTCGAAAGACACAAAGCTCGG  
GCTGGATATC CAAAGCTTGAGTTAAGAATCCTATGA

>L1.4

ATGGCGGAGAAAGTATTCAGCGCGAAAGAGATCTTCGCCGCCGATTCGTCC  
AACATCTTCATAATGATTCTGGCATTGTTGATTTGGCTCGGAGCTATACACCT  
CAATTCCTCTTTATTCTCTTGTTGATATTCCTTCCTCTCTCCAAATCACTCTT  
GCTTTTTGGTTTGCTGGTTGTGTTGGTGGTGATTCCGGTGGACGATAAGAG  
CAGATTGGGAAGAAGGTTGGCGAGGTCCTTAAGCAAGTATGCTTGTAGTTA  
CTCCCGGTCACGCTTCATGTAGAGGATATGAATGCATTTGATCCTAATCGC  
GCTTATGTTTTGGTTATGAACCACACTCGGTTTTGCCAATTGGTGTCAATTG  
CACTAGCTGAAAGCATTGGTTGGATGCCACTTCCAAAATTGAAAGTTCTTG  
CTAGCAGTGCAATTTTTACATAACCGGTGTTGAGACACTTATGGACATGGTT  
TGCGTCACACGCGCAGCAAAGAAAAATTTATCTCCAGTTATCAGCTGA  
TACTCTTGCCTTTAATACCTGGTGGAGTGCAAGAAACATTTTTTATGAAGC  
ATGGCTCCGAGATTGCTTTCCTTAAAACAAGAAGAGGATTTGTTTCGTATAGC  
AATGGAGCGTGGTCATCCCTGGTTCCAACCTTTTTGCTTTGGTCAGGTA  
TTGGCTTTATAAACTATATATACTCCAAAATTTATTTGTGTATAGTTTCCTT  
ATCTGTAAATTTCACTCAATTTTCTTTGCTCATGCAATCAAGTTAACCCCTT  
TTGGTGTAACCTTGCCATAGTCAGATGTCTACAAGTGGTGGAAACCAAGTG  
GGACGTTGGTTATGAACTTTCAAGAGCTATAAAGTTCCGCCCCAATATTTTA  
CTGGGGGATTTTCGGGTGTGTGTTTCTTTTATGCATATATGTGAACTGTTTTC  
ACTGGCCAAGGGTAATTCAACAACAGCTGAAGCTGAATACTATTTATGGTT  
AAGAATAGCCTGTGTAAACAAACATTTTTTTCTATCAACATTGATGATTCTTG  
TAACGAAACAGCATCGCATTGCCTGATTACATAGGCAACTCCATATATGTA  
TTGAAAATACTTATAAAAGCCTTGAATAATTGATTTGAGTAGAATAGCTACT  
GCACTAGTATAGTTAAGCATGTAAGATGCTGTTGTATACTTGTATGGAGCAA  
TTTTCGGAAACTGATATTTGAAAGCCACTCCTTTTCAGAACCAATACCGTT  
CAGACGTCCAATGTATATAGCAGTGGGCAGACCAATTGAACCTCCCAAAAA

TCCAGAACCAACCCAGGAGGAGGTTGACAAAGTGCTTATTCAGTTTGTGG  
ATGCACTACAAGATCTATTCGAAAGACACAAAGCTCGGGCTGGATATCCAA  
AGCTTGAGTTAAGAATCCTATGA

>L1.5

ATGGCGGAGAAAGTATTCAGCGCGAAAGAGATCTTCGCCGCCGATTCGTCC  
AACATCTTCATAATGATTCTGGCATTGTTGATTTGGCTCGGAGCTATACACCT  
CAATTTCCCTCTTTATTCTCTTGTGATATTCCTTCCTCTCTCCAAATCACTCTT  
GCTTTTTGGTTTGTCTGGTTGTGTTGGTGGTGATTCCGGTGGACGATAAGAG  
CAGATTGGGAAGAAGGTTGGCGAGGTCCTTAAGCAAGTATGCTTGTAGTTA  
CTTCCCGGTCACGCTTCATGTAGAGGATATGAATGCATTTGATCCTAATCGC  
GCTTATGTTTTTGGTTATGAACCACACTCGGTTTTGCCAATTGGTGTTCATTG  
CACTAGCTGAAAGCATTGGTTGGATGCCACTTCCAAAATTGAAAGTTCTTG  
CTAGTAGTGCAATTTTTTACATAACCGGTGTTGAGACACTTATGGACATGGTT  
TGGCGTCACACGCGCAGCAAAGAAAAATTTTATCTCCAGTTATCAGCTGG  
ATACTCTTGCGTTTTAATACCTGGTGGAGAGCAAGAAACATTTTTTATGAAG  
CATGGCTCCGAGATTGCTTTCCTTAAAACAAGAAGAGGATTTGTTTCGTATAG  
CAATGGAGCGTGGTCATCCCTTGGTTCCAACTTTTTGGCTTTGAACACCAATA  
CCGTTTCAGACGTCCAATGTATATAGCAGTGGGCAGACCAATTGAACCTCCC  
AAAAATCCAGAACCAACCCAGGAGGAGGTTGACAAAGTGCTTATTCAGTT  
TGTGGATGCACTACAAGATCTATTCGAAAGACACAAAGCTCGGGCTGGATA  
TCCAAAAGCTTGAGTTAAGAATCCTATGA

Note: the red words indicate the position of the primers.
