# Supplementary material for: Discovery, identification, and functional characterization of long noncoding RNAs in Arachis hypogaea L
Source: PubMed Central journal article supplement (PMC7330965; doi:10.1186/s12870-020-02510-4), 2020-07-02

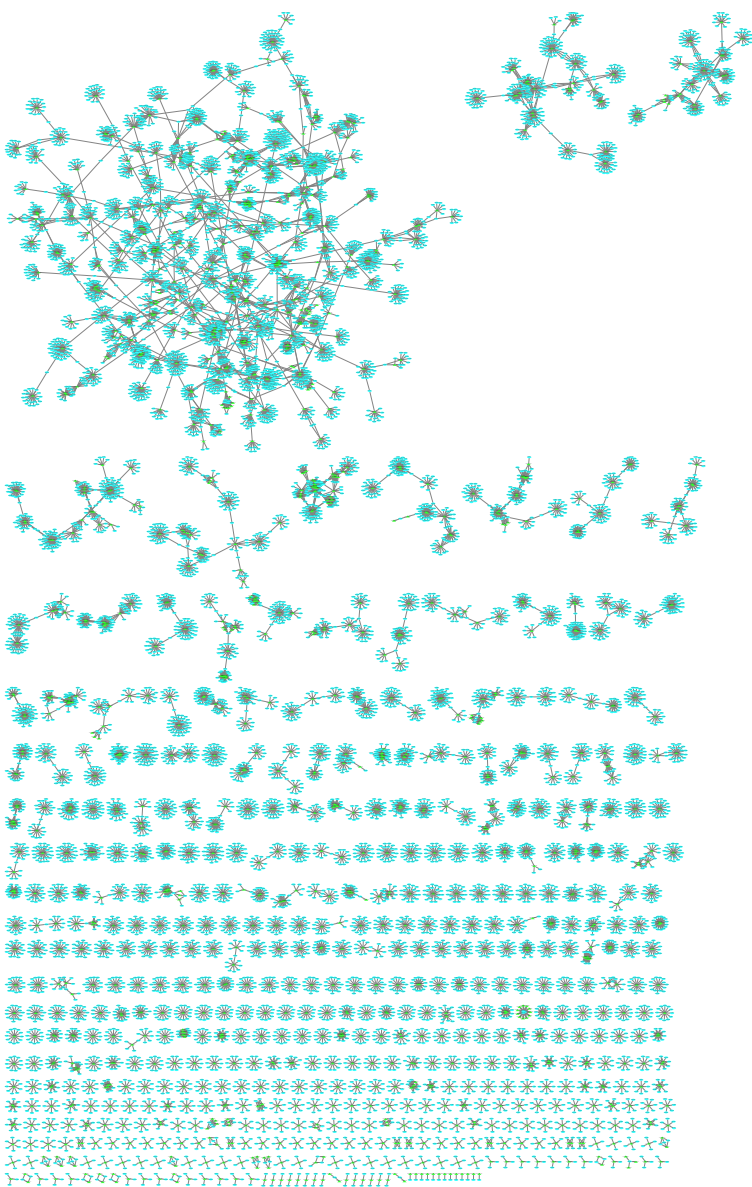

Supplement: 12870_2020_2510_MOESM15_ESM.pdf [file 12870_2020_2510_MOESM15_ESM.pdf]
